# Supplementary material for: Elucidation of the mechanism of berberine against gastric mucosa injury in a rat model with chronic atrophic gastritis based on a combined strategy of multi-omics and molecular biology
Source: Front Pharmacol. 2025 Jan 6;15:1499753. doi: 10.3389/fphar.2024.1499753 (PMC11743660; doi:10.3389/fphar.2024.1499753)
Supplement: Supplementary file 6 [file Table4.xlsx]

## Sheet: Sheet1
Formula	Compounds	Class I	Class II	CAS	Control1	Control2	Control3	Control4	Control5	Control6	Model1	Model2	Model3	Model4	Model5	Model6	BH1	BH2	BH3	BH4	BH5	BH6
C6H12N2O4	Ala-Ser	Amino acid and Its metabolites	Small Peptide	3303-41-1	376896	462075	372909	547025	474463	477437	373116	369562	262859	296562	417220	316802	389769	426930	501140	486974	580384	427396
C10H20N4O4	Asn-Lys	Amino acid and Its metabolites	Small Peptide	22677-58-3	109283	111742	104775	137893	118017	125280	102220	87311.5	94336.2	100060	97134.4	91790.2	115753	114410	133685	164869	170960	121831
C8H12N2O2	Cyclo(Ala-Pro)	Amino acid and Its metabolites	Small Peptide	36357-32-1	78779.3	80589.2	82418.4	76904.2	99105.5	110702	125096	88572.9	120416	156165	128853	156228	98319.6	113223	73803.4	92856.4	101524	101100
C14H16N2O2	Cyclo(Phe-Pro)	Amino acid and Its metabolites	Small Peptide	14705-60-3	31075.9	43695.1	25898.9	40654.8	38840.4	36712.3	60020.1	34925.8	72850.1	90189.7	70110.1	105206	28002.6	38613.9	29260.5	34294.6	42632.3	44729.3
C14H16N2O2	Cyclo(Pro-Phe)	Amino acid and Its metabolites	Small Peptide	3705-26-8	31075.9	43695.1	25898.9	40654.8	38840.4	36712.3	60020.1	34925.8	72850.1	90189.7	70110.1	105206	28002.6	38613.9	29260.5	34294.6	42632.3	44729.3
C9H19N3O3	Lys-Ala	Amino acid and Its metabolites	Small Peptide	17043-71-9	876003	944542	711308	819426	969540	803098	651624	733437	706485	707308	476972	690374	1.09091e+06	942037	935381	1.17731e+06	1.10387e+06	720211
C15H23N3O3	Lys-Phe	Amino acid and Its metabolites	Small Peptide	6235-35-4	937146	1.03781e+06	1.11865e+06	1.12565e+06	1.022e+06	970704	1.36684e+06	1.2748e+06	902784	1.32539e+06	1.23459e+06	1.29952e+06	941112	1.04353e+06	1.12008e+06	1.14307e+06	763237	987995
C9H19N3O4	Lys-Ser	Amino acid and Its metabolites	Small Peptide	6665-19-6	1.16176e+06	1.78901e+06	1.18295e+06	1.47287e+06	1.90197e+06	1.45822e+06	1.23911e+06	963989	1.13271e+06	1.06176e+06	1.15979e+06	1.04013e+06	1.32556e+06	2.03705e+06	1.80185e+06	1.95319e+06	1.61136e+06	1.72056e+06
C17H19N5O3	Trp-His	Amino acid and Its metabolites	Small Peptide	-	106075	65783	79783.1	64626.7	97747.1	96675	118231	85091.9	167558	140861	113190	124852	173671	226111	142269	118256	183389	172363
C11H18N4O3	Val-His	Amino acid and Its metabolites	Small Peptide	13589-07-6	215646	266636	228539	270411	233764	292416	234923	196333	203592	231535	222678	204501	268826	281921	250734	238030	285076	215946
C10H14N2O2	cyclo(pro-pro)	Amino acid and Its metabolites	Small Peptide	-	49538.9	43655.7	34153.3	45458.8	49674.1	77541.1	84123.5	63114.4	107934	121532	111019	138332	42870.8	34916.1	32016.8	40754.3	47044	52169.2
C7H11N3O2	1-Methylhistidine	Amino acid and Its metabolites	Amino acid derivatives	332-80-9	785679	930087	816182	867668	1.12858e+06	784533	517948	628543	409414	371816	327619	419170	988676	763910	1.63144e+06	1.20326e+06	792099	973351
C4H9NO2	2-Aminoisobutyric Acid	Amino acid and Its metabolites	Amino acid derivatives	62-57-7	221265	253393	224863	276940	255328	327045	585070	654824	485830	606295	1.01311e+06	854277	403910	235338	173352	222223	350435	177714
C7H13N3O3	3-N-Methyl-L-Histidine	Amino acid and Its metabolites	Amino acid derivatives	368-16-1	2.97254e+06	4.34867e+06	4.35276e+06	3.98685e+06	4.78287e+06	4.4574e+06	2.00396e+06	2.25059e+06	1.86275e+06	2.02857e+06	2.11438e+06	2.41093e+06	2.47705e+06	3.3513e+06	3.25513e+06	3.14377e+06	2.37108e+06	3.23803e+06
C9H19N3O3	Ala-Lys	Amino acid and Its metabolites	Amino acid derivatives	6366-77-4	876003	944542	711308	819426	969540	803098	651624	733437	706485	707308	476972	690374	1.09091e+06	942037	935381	1.17731e+06	1.10387e+06	720211
C4H9NO3	L-Allothreonine	Amino acid and Its metabolites	Amino acid derivatives	28954-12-3	9710365	11348550	11436890	10763955	8935295	11391810	7803195	7.25753e+06	7562365	8917565	11148625	8261335	14380250	11962615	9562500	10448335	10654485	8406125
C5H9NO4	L-threo-3-Methylaspartate	Amino acid and Its metabolites	Amino acid derivatives	6061-13-8	9.20162e+07	8.28122e+07	1.00338e+08	7.43618e+07	7.83741e+07	7.70092e+07	8.69459e+07	1.04121e+08	9.01293e+07	1.00006e+08	9.80688e+07	9.60193e+07	7.91426e+07	8.13794e+07	8.28928e+07	8.47593e+07	7.17014e+07	7.0154e+07
C4H9NO2	N,N-Dimethylglycine	Amino acid and Its metabolites	Amino acid derivatives	1118-68-9	221265	253393	224863	276940	255328	327045	585070	654824	485830	606295	1.01311e+06	854277	403910	235338	173352	222223	350435	177714
C6H11NO3	N-Butyrylglycine	Amino acid and Its metabolites	Amino acid derivatives	20208-73-5	60022.2	55888	66791.9	99872.2	84112.2	136048	47837.1	50056.7	19408.9	49615	38752.5	60982.5	108988	121671	65368.5	92105.2	71425.8	52771.4
C7H13NO3	N-Isovaleroylglycine	Amino acid and Its metabolites	Amino acid derivatives	16284-60-9	83440.7	100981	92347.5	90348.6	125825	98294.5	59083.1	13810.3	42225.8	64856	32089.1	59072.7	95154	99671.7	73124.8	99674.8	68069	79839.6
C4H10NO6P	O-Phospho-L-threonine	Amino acid and Its metabolites	Amino acid derivatives	1114-81-4	945551	1.18743e+06	1.04157e+06	909672	748911	942313	909161	872683	734074	803333	614615	708172	1.00821e+06	914097	963564	729061	884066	1.02846e+06
C13H16N2O4	Phenylacetyl-L-Glutamine	Amino acid and Its metabolites	Amino acid derivatives	28047-15-6	71113.7	74456.5	61008.2	53170.7	56018.4	57470.7	47866.2	48241	34999.5	41902.6	48624.9	44321.4	34231.4	32825.4	45957.3	25570.3	31097.7	28359.5
C3H7NO5S2	S-Sulfo-L-Cysteine	Amino acid and Its metabolites	Amino acid derivatives	1637-71-4	725481	1.70467e+06	246614	1.37711e+06	544197	1.74836e+06	100411	75525.4	84401.1	83560.5	43285.6	294196	987862	1.74685e+06	504120	1.66199e+06	293631	1.31325e+06
C4H9NO2	aminoisobutyric acid	Amino acid and Its metabolites	Amino acid derivatives	4249-19-8	221265	253393	224863	276940	255328	327045	585070	654824	485830	606295	1.01311e+06	854277	403910	235338	173352	222223	350435	177714
C4H9NO2	γ-Aminobutyric Acid	Amino acid and Its metabolites	Amino acid derivatives	56-12-2	68398.2	59965.4	49846.7	66743.9	78520.8	106710	234713	203531	131735	126481	289664	233355	138405	57907.5	63694.1	44035.5	65020	69687.4
C5H12N2O2	D-Ornithine	Amino acid and Its metabolites	Amino acids	348-66-3	1.53024e+06	1.78496e+06	2.22466e+06	2.08953e+06	2.24816e+06	2.86487e+06	5.67574e+06	4.70309e+06	2.08605e+06	3.7638e+06	3.36264e+06	6.00891e+06	2.40292e+06	2.77351e+06	2.58987e+06	2.16425e+06	2.5921e+06	3.34566e+06
C5H9NO4	L-Glutamic Acid	Amino acid and Its metabolites	Amino acids	56-86-0	9.20162e+07	8.28122e+07	1.00338e+08	7.43618e+07	7.83741e+07	7.70092e+07	8.69459e+07	1.04121e+08	9.01293e+07	1.00006e+08	9.80688e+07	9.60193e+07	7.91426e+07	8.13794e+07	8.28928e+07	8.47593e+07	7.17014e+07	7.0154e+07
C9H11NO3	L-Tyrosine	Amino acid and Its metabolites	Amino acids	60-18-4	335648	443266	383999	397067	500426	442960	261134	341096	260014	241625	263137	225447	460892	485230	415288	369315	389476	343821
C8H18N2O2	N(6),N(6)-Dimethyl-L-lysine	Amino acid and Its metabolites	Amino acids	2259-86-1	202156	190584	265255	306775	323705	292950	499538	522342	242590	542388	512390	588801	185893	246504	192267	234495	193566	259358
C9H10O3	2-(4-hydroxyphenyl) propionate	Benzene and substituted derivatives	Phenolic acids	938-96-5	59254.7	218126	74480.2	344478	105955	297075	667445	479926	576063	613594	546721	758359	290247	193617	116120	292246	146899	614420
C9H10O5	4-Hydroxy-3,5-dimethoxybenzoic acid	Benzene and substituted derivatives	Phenolic acids	530-57-4	24799.4	32967.7	34222.5	45495.2	18997.1	48887.1	68252.2	78740	72558.4	75955.9	68466.2	105425	37236.9	27259.2	14726.8	20308.5	20933.5	29002.3
C7H6O3	4-Hydroxybenzoic Acid	Benzene and substituted derivatives	Phenolic acids	99-96-7	617172	509768	504367	499180	507873	540145	813510	624093	703066	728928	671791	750233	633587	577103	454599	407632	512131	501581
C9H8O2	3-(4-hydroxyphenyl)acrylaldehyde	Benzene and substituted derivatives	Benzene and substituted derivatives	2538-87-6	605287	597993	563056	550893	544987	546676	514301	557377	506205	518034	535047	503823	486751	419120	482803	472490	390014	479571
C8H8O4	3-Hydroxy-4-methoxybenzoic acid	Benzene and substituted derivatives	Benzene and substituted derivatives	645-08-9	19464.6	26221.8	46260.9	41374.1	18185.6	63362.9	73520.7	81371.7	77524.8	130471	127035	131191	40506.2	45088.5	23032.6	18676	26225.8	32337.5
C7H6O	Benzaldehyde	Benzene and substituted derivatives	Benzene and substituted derivatives	100-52-7	1.29883e+07	1.38613e+07	1.09884e+07	1.30638e+07	1.40019e+07	1.33739e+07	1.20063e+07	1.07202e+07	1.15776e+07	1.15159e+07	1.15322e+07	1.2303e+07	1.34737e+07	1.45041e+07	1.37253e+07	1.3221e+07	1.26699e+07	1.24569e+07
C16H12O6	Chrysoeriol	Benzene and substituted derivatives	Benzene and substituted derivatives	491-71-4	9479.14	5937.81	1974.77	12494.8	7892.06	7140.87	94051.7	39216	64448	106935	72334.2	118030	10169.7	24637.4	16795.2	11999.3	8561.4	14024.8
C15H10O4	Chrysophanol	Benzene and substituted derivatives	Benzene and substituted derivatives	481-74-3	186217	192064	148416	80675.7	220719	395244	4.49735e+06	2.01482e+06	3.37296e+06	4.38469e+06	3.84691e+06	5.85132e+06	223059	261690	170682	124504	163472	324168
C21H18O11	Genistein-4'-glucuronide	Benzene and substituted derivatives	Benzene and substituted derivatives	245084-07-5	40326.7	43753.7	6366.13	43599.5	19685.4	17277.7	790056	219640	1.28676e+06	2.00837e+06	1.37381e+06	3.07629e+06	42743.8	70939.7	29901.4	23772.1	36275.7	50368.2
C7H6O2	Salicylaldehyde	Benzene and substituted derivatives	Benzene and substituted derivatives	90-02-8	2.2654e+06	2.37953e+06	2.26198e+06	1.94011e+06	1.69074e+06	2.54251e+06	3.83402e+06	2.41732e+06	2.39231e+06	4.33267e+06	3.05421e+06	4.6174e+06	2.5454e+06	2.6439e+06	1.70688e+06	1.73746e+06	2.97729e+06	2.05243e+06
C8H10O2	Tyrosol	Benzene and substituted derivatives	Benzene and substituted derivatives	501-94-0	631078	547803	652547	694632	481180	747366	1.01944e+06	758017	944208	999939	861196	1.01236e+06	850750	753045	578690	624598	630603	656800
C3H9NO	1-Aminopropan-2-ol	Alcohol and amines	Alcohols	78-96-6	185623	283869	374257	286977	238085	253616	321208	761550	298559	534651	438149	489398	176698	240566	172754	301557	262910	246453
C8H11NO	2-Amino-1-phenylethanol	Alcohol and amines	Alcohols	7568-93-6	29597.1	15406	37453.4	112619	22728.7	65974.2	447985	532213	214453	227746	224297	257439	254038	33564	72627.4	19973.4	57478.8	36705.7
C3H5NO	Acrylamide	Alcohol and amines	Amines	79-06-1	579515	1011920	571150	813990	785500	775445	594575	475800	400565	735230	626380	577840	547725	1030385	746960	782145	817345	819020
C8H11N	Phenethylamine	Alcohol and amines	Amines	64-04-0	224432	92027.8	493154	1.69769e+06	339709	3.51475e+06	6.44667e+06	4.70274e+06	653747	5.77899e+06	6.69332e+06	1.01991e+07	1.47041e+06	654936	1.74835e+06	566132	1.00698e+06	1.12805e+06
C3H9NO	Trimethylamine-N-Oxide	Alcohol and amines	Amines	1184-78-7	185623	283869	374257	286977	238085	253616	321208	761550	298559	534651	438149	489398	176698	240566	172754	301557	262910	246453
C24H38O4	12-ketolithocholic acid	Bile acids	Bile acids	5130-29-0	7.00089e+06	264074	2.96662e+06	2.70363e+06	5.76599e+06	4.32786e+06	893332	1.54783e+06	798327	1.1344e+06	478725	740738	3.68452e+07	9.47668e+06	2.16737e+07	6.36657e+06	2.95783e+06	3.14805e+07
C24H38O4	7-ketolithocholic acid	Bile acids	Bile acids	4651-67-6	7.00089e+06	264074	2.96662e+06	2.70363e+06	5.76599e+06	4.32786e+06	893332	1.54783e+06	798327	1.1344e+06	478725	740738	3.68452e+07	9.47668e+06	2.16737e+07	6.36657e+06	2.95783e+06	3.14805e+07
C24H38O4	Apocholic acid	Bile acids	Bile acids	641-81-6	7.00089e+06	264074	2.96662e+06	2.70363e+06	5.76599e+06	4.32786e+06	893332	1.54783e+06	798327	1.1344e+06	478725	740738	3.68452e+07	9.47668e+06	2.16737e+07	6.36657e+06	2.95783e+06	3.14805e+07
C26H45NO5S	Taurolithocholic acid	Bile acids	Bile acids	516-90-5	68323.3	52441.6	64015	37235.5	130120	73542.5	134950	81279.7	410500	480795	91524.7	378443	631995	801002	418360	375153	744468	522294
C6H5NO3	6-Hydroxynicotinic Acid	CoEnzyme and vitamins	CoEnzyme and vitamins	5006-66-6	293130	317926	287793	219527	279400	514695	539668	653383	379266	462085	388497	474850	234076	189716	304903	199225	219206	217355
C28H52NO7P	LPC(0:0/20:3)	GP	LPC	-	3.87256e+06	4.88488e+06	4.45335e+06	4.15694e+06	4.35804e+06	5.04947e+06	2.02147e+06	1.77685e+06	3.27651e+06	3.9944e+06	4.43767e+06	3.61173e+06	6.23076e+06	4.9852e+06	4.44543e+06	5.52176e+06	7.03957e+06	6.23285e+06
C19H39O7P	LPA(0:0/16:0)	GP	LPA	-	3.60811e+07	4.96293e+07	3.3365e+07	4.41214e+07	5.17244e+07	4.78479e+07	3.69508e+07	2.60394e+07	4.61528e+07	3.09324e+07	3.70911e+07	2.20131e+07	4.84325e+07	3.38976e+07	5.43693e+07	5.05442e+07	5.64337e+07	4.2668e+07
C5H7N3O	5-Methylcytosine	Nucleotide and Its metabolites	Nucleotide and Its metabolites	554-01-8	7.22607e+06	6.51564e+06	8.12245e+06	7.93029e+06	8.51677e+06	7.30929e+06	8.16388e+06	8.39999e+06	8.81639e+06	7.74329e+06	8.66283e+06	8.62493e+06	7.00145e+06	6.91903e+06	7.22063e+06	8.01417e+06	8.24218e+06	7.58673e+06
C6H7N3O	6-aminonicotinamide	Nucleotide and Its metabolites	Nucleotide and Its metabolites	329-89-5	411990	406884	359510	390231	503536	434169	446988	471425	591830	683210	499359	730727	372717	263831	397422	354379	379034	302637
C4H4N6O	8-Azaguanine	Nucleotide and Its metabolites	Nucleotide and Its metabolites	134-58-7	5.81797e+06	8.90461e+06	8.74687e+06	1.04285e+07	7.35566e+06	6.81625e+06	6.40057e+06	801819	7.01936e+06	1.88054e+06	4.24825e+06	6.03748e+06	9.40113e+06	8.80484e+06	6.91443e+06	1.11838e+07	9.52823e+06	8.44305e+06
C5H4N4O2	Oxypurinol	Nucleotide and Its metabolites	Nucleotide and Its metabolites	2465-59-0	5.81797e+06	8.90461e+06	8.74687e+06	1.04285e+07	7.35566e+06	6.81625e+06	6.40057e+06	801819	7.01936e+06	1.88054e+06	4.24825e+06	6.03748e+06	9.40113e+06	8.80484e+06	6.91443e+06	1.11838e+07	9.52823e+06	8.44305e+06
C5H6N2O2	Thymine	Nucleotide and Its metabolites	Nucleotide and Its metabolites	65-71-4	511919	400142	531109	1.25914e+06	659738	1.1117e+06	1.56325e+06	2.30445e+06	955191	1.55472e+06	1.81399e+06	2.54616e+06	1.95891e+06	772342	989601	536987	511830	609773
C9H12N2O6	Β-Pseudouridine	Nucleotide and Its metabolites	Nucleotide and Its metabolites	1445-07-4	834660	1.01175e+06	847829	772220	783802	811511	760187	690176	758070	732836	579979	593962	829769	716082	946297	813408	759250	715154
C12H18O11	2-O-α-D-glucopyranosyl-L-ascorbic acid	Carbohydrates and Its metabolites	Sugar derivatives	129499-78-1	134490	83120.3	38345	127246	107309	80647.9	211734	115493	138228	159014	145536	247599	68896.8	55773.3	105010	55270.9	101589	71860.9
C6H10O8	Glucaric acid	Carbohydrates and Its metabolites	Sugar acids	576-42-1	26542.1	29931.3	19047.8	26469.8	15221.5	13290.6	49098.4	33242.5	31233	50566.3	55808.3	51627.7	15414.4	16959.5	16746.9	30326.8	23201.2	38395.2
C6H12O7	Gluconic Acid	Carbohydrates and Its metabolites	Sugar acids	526-95-4	121762	122999	174971	211627	194943	234681	620493	237323	550013	774231	782385	1.34347e+06	200682	288705	233480	270142	272061	336259
C6H10O8	Mucic Acid	Carbohydrates and Its metabolites	Sugar acids	526-99-8	26542.1	29931.3	19047.8	26469.8	15221.5	13290.6	49098.4	33242.5	31233	50566.3	55808.3	51627.7	15414.4	16959.5	16746.9	30326.8	23201.2	38395.2
C9H18O8	(2R)-1-O-beta-D-Galactopyranosylglycerol	Carbohydrates and Its metabolites	Carbohydrates and Its metabolites	16232-91-0	23279.1	18090.1	19027.9	35764.9	24630.5	26362.9	77577.1	42150.2	54834.2	80684.5	75557.9	135531	31846.3	15005	17111.7	16973.7	18356.5	43023.1
C12H23O14P	Sucrose 6′-monophosphate	Carbohydrates and Its metabolites	Phosphate sugars	-	159451	204647	163896	168855	195102	232274	298172	323815	507665	345662	323841	440944	388811	208662	227359	256272	149911	196967
C4H8O3	(R)-2-Hydroxybutyric acid	Organic acid and Its derivatives	Organic acid and Its derivatives	20016-85-7	653101	612485	501285	585809	804661	695266	459075	477567	601942	430536	492902	539767	1.15862e+06	1.3033e+06	1.06303e+06	637463	897661	528629
C15H22O2	1-Deoxyvaleric acid	Organic acid and Its derivatives	Organic acid and Its derivatives	-	1.46459e+06	1.29532e+06	1.55842e+06	1.38041e+06	1.42543e+06	1.55583e+06	1.63125e+06	1.84945e+06	1.42561e+06	1.62344e+06	1.59861e+06	1.93551e+06	1.49402e+06	1.64708e+06	1.35361e+06	1.3607e+06	1.16715e+06	1.39825e+06
C5H10O3	2-Hydroxy-2-Methyl Butyric acid	Organic acid and Its derivatives	Organic acid and Its derivatives	3739-30-8	363902	428353	376619	283061	460240	583778	3.06207e+06	1.00415e+06	2.39927e+06	4.80007e+06	3.83434e+06	5.49858e+06	686964	526751	602920	453261	554357	553999
C5H10O3	2-Hydroxy-3-Methyl Butanoic Acid	Organic acid and Its derivatives	Organic acid and Its derivatives	4026-18-0	338807	423530	329362	283640	455127	555207	2.88074e+06	942343	2.30383e+06	4.27099e+06	3.41089e+06	5.20261e+06	631226	497336	522807	441822	543805	520510
C6H12O3	2-Hydroxy-4-methylpentanoic acid	Organic acid and Its derivatives	Organic acid and Its derivatives	13748-90-8	1.30369e+06	1.58357e+06	1.23686e+06	1.03715e+06	811351	2.70278e+06	1.66891e+07	6.08324e+06	1.29473e+07	2.29464e+07	1.69056e+07	2.37144e+07	3.65198e+06	1.27653e+06	1.5422e+06	951409	1.41025e+06	1.16117e+06
C6H12O3	2-Hydroxyhexanoic acid	Organic acid and Its derivatives	Organic acid and Its derivatives	6064-63-7	1.30369e+06	1.58357e+06	1.23686e+06	1.03715e+06	811351	2.70278e+06	1.66891e+07	6.08324e+06	1.29473e+07	2.29464e+07	1.69056e+07	2.37144e+07	3.65198e+06	1.27653e+06	1.5422e+06	951409	1.41025e+06	1.16117e+06
C6H12O3	2-Hydroxyisocaproic Acid	Organic acid and Its derivatives	Organic acid and Its derivatives	498-36-2	1.30369e+06	1.58357e+06	1.23686e+06	1.03715e+06	811351	2.70278e+06	1.66891e+07	6.08324e+06	1.29473e+07	2.29464e+07	1.69056e+07	2.37144e+07	3.65198e+06	1.27653e+06	1.5422e+06	951409	1.41025e+06	1.16117e+06
C4H8O3	2-Methyllactic acid	Organic acid and Its derivatives	Organic acid and Its derivatives	594-61-6	653101	612485	501285	585809	804661	695266	459075	477567	601942	430536	492902	539767	1.15862e+06	1.3033e+06	1.06303e+06	637463	897661	528629
C11H8O2	2-Naphthoic acid	Organic acid and Its derivatives	Organic acid and Its derivatives	93-09-4	7.52714e+06	6.84406e+06	7.33481e+06	6.79775e+06	7.18119e+06	7.12053e+06	6.63151e+06	7.12155e+06	6.86958e+06	6.31113e+06	6.63776e+06	6.43372e+06	5.64197e+06	6.03897e+06	6.13784e+06	6.19617e+06	6.28791e+06	6.10151e+06
C6H12O3	5-Hydroxyhexanoic Acid	Organic acid and Its derivatives	Organic acid and Its derivatives	185956-02-9	1.30369e+06	1.58357e+06	1.23686e+06	1.03715e+06	811351	2.70278e+06	1.66891e+07	6.08324e+06	1.29473e+07	2.29464e+07	1.69056e+07	2.37144e+07	3.65198e+06	1.27653e+06	1.5422e+06	951409	1.41025e+06	1.16117e+06
C11H10O2	5-Phenylpenta-2,4-Dienoic Acid	Organic acid and Its derivatives	Organic acid and Its derivatives	1552-94-9	2.38678e+06	2.2645e+06	2.37528e+06	2.34872e+06	2.22144e+06	2.19615e+06	2.12861e+06	2.21714e+06	1.99094e+06	2.05168e+06	2.21125e+06	2.10841e+06	2.02719e+06	1.89226e+06	1.99825e+06	1.87713e+06	2.04742e+06	1.85059e+06
C9H10O3	DL-3-Phenyllactic acid	Organic acid and Its derivatives	Organic acid and Its derivatives	828-01-3	282838	374080	293137	265099	239187	634144	3.90158e+06	1.34004e+06	2.99322e+06	5.24717e+06	4.14908e+06	5.12176e+06	690539	332657	531966	290977	358309	451235
C9H10O4	Hydroxyphenyllactic acid	Organic acid and Its derivatives	Organic acid and Its derivatives	306-23-0	33188	30707.3	33259.6	37047.3	43751.8	60285.9	223793	85515	114286	222189	231540	342332	123761	78202.4	66469.3	66400.3	88571.6	95877.9
C14H18N2O2	Hypaphorine	Organic acid and Its derivatives	Organic acid and Its derivatives	487-58-1	2.71033e+06	2.96411e+06	2.73696e+06	2.0523e+06	2.24283e+06	2.37678e+06	1.55165e+06	1.48476e+06	1.64656e+06	1.68202e+06	1.67708e+06	1.22722e+06	2.87449e+06	2.01747e+06	3.0071e+06	1.82388e+06	3.09717e+06	1.80988e+06
C4H9NO2	L-2-Aminobutyric acid	Organic acid and Its derivatives	Organic acid and Its derivatives	1492-24-6	221265	253393	224863	276940	255328	327045	585070	654824	485830	606295	1.01311e+06	854277	403910	235338	173352	222223	350435	177714
C9H10O3	L-3-Phenyllactic acid	Organic acid and Its derivatives	Organic acid and Its derivatives	20312-36-1	192460	189434	221068	406872	201013	552495	1.74635e+06	798762	1.51659e+06	2.6016e+06	1.99205e+06	2.59976e+06	578786	340405	380741	116336	338657	179690
C4H9NO3	L-Homoserine	Organic acid and Its derivatives	Organic acid and Its derivatives	672-15-1	9710365	11348550	11436890	10763955	8935295	11391810	7803195	7.25753e+06	7562365	8917565	11148625	8261335	14380250	11962615	9562500	10448335	10654485	8406125
C3H6O3	Lactic acid	Organic acid and Its derivatives	Organic acid and Its derivatives	79-33-4	1.25797e+06	1.46159e+06	1.25119e+06	1.50264e+06	1.58433e+06	1.62262e+06	2.12464e+06	1.25201e+06	1.99087e+06	2.53957e+06	2.51127e+06	2.9476e+06	1.51548e+06	1.61621e+06	1.65938e+06	1.54663e+06	1.79484e+06	1.3905e+06
C4H6O5	Malic acid	Organic acid and Its derivatives	Organic acid and Its derivatives	636-61-3	4.95261e+06	5.79056e+06	4.24396e+06	5.60675e+06	5.34562e+06	6.35493e+06	8.1697e+06	3.77463e+06	9.38953e+06	7.82785e+06	7.99986e+06	7.67705e+06	1.05158e+07	9.87459e+06	9.36681e+06	8.37525e+06	1.38621e+07	1.31509e+07
C7H6O3	Salicylic acid	Organic acid and Its derivatives	Organic acid and Its derivatives	69-72-7	716363	666269	730088	719154	768962	693006	1.0711e+06	835370	954071	1.00731e+06	917414	1.10899e+06	968704	840650	658345	597683	810649	791818
C9H10O3	Tropate	Organic acid and Its derivatives	Organic acid and Its derivatives	529-64-6	282838	374080	293137	265099	239187	634144	3.90158e+06	1.34004e+06	2.99322e+06	5.24717e+06	4.14908e+06	5.12176e+06	690539	332657	531966	290977	358309	451235
C8H8O4	Vanillic Acid	Organic acid and Its derivatives	Organic acid and Its derivatives	121-34-6	13788.8	14980.4	15941.3	11194.7	19971.5	24363.8	34979.3	46405.2	39180.9	76761.8	65342.5	74932.6	21620.7	27897.1	12720	16310.1	18280.5	15851.4
C5H8O5	α-Hydroxyglutaric Acid (sodium salt)	Organic acid and Its derivatives	Organic acid and Its derivatives	40951-21-1	1.30183e+06	860780	627871	855298	805217	1.03338e+06	1.57023e+06	1.25564e+06	1.31903e+06	1.07697e+06	1.34841e+06	1.67239e+06	1.13904e+06	1.09982e+06	974689	886328	1.29949e+06	1.21189e+06
C15H10O4	Hispidol	Heterocyclic compounds	Heterocyclic compounds	5786-54-9	99855.5	115836	81101.2	44909.6	111468	206478	2.43697e+06	989109	1.8002e+06	2.31589e+06	2.05418e+06	3.05267e+06	122112	145729	89901.1	54347	96289.6	139680
C9H7NO	Hydroxyquinoline	Heterocyclic compounds	Heterocyclic compounds	148-24-3	9.15648e+06	1.06291e+07	8.08756e+06	1.07531e+07	1.0327e+07	1.09969e+07	7.90143e+06	6.35775e+06	8.70526e+06	7.93588e+06	6.8363e+06	8.83126e+06	9.95851e+06	1.12394e+07	9.01481e+06	7.56351e+06	1.0381e+07	9.40637e+06
C10H9NO	1-acetylindole	Heterocyclic compounds	Indole and Its derivatives	576-15-8	2.65544e+06	2.64327e+06	2.43835e+06	2.69635e+06	2.7327e+06	2.97156e+06	2.50002e+06	2.17571e+06	2.58069e+06	2.51464e+06	2.07525e+06	2.50964e+06	2.80378e+06	3.00923e+06	2.66389e+06	2.33864e+06	2.85131e+06	2.84115e+06
C9H9NO	Indole 3-carbinol	Heterocyclic compounds	Indole and Its derivatives	700-06-1	6.28973e+06	6.05668e+06	6.02899e+06	5.58136e+06	5.62879e+06	5.66454e+06	5.44126e+06	5.47624e+06	5.47092e+06	5.60361e+06	5.27363e+06	5.39635e+06	4.83502e+06	4.58053e+06	4.72235e+06	4.50461e+06	4.25486e+06	4.8301e+06
C9H7NO	Indole-3-Carboxaldehyde	Heterocyclic compounds	Indole and Its derivatives	487-89-8	4.37557e+06	4.1647e+06	4.48741e+06	4.37817e+06	4.48036e+06	4.39892e+06	4.27937e+06	4.15738e+06	4.25147e+06	4.2326e+06	4.06139e+06	4.1442e+06	4.13242e+06	3.84283e+06	4.02264e+06	4.07878e+06	3.95513e+06	4.19883e+06
C9H7NO	Indole-4-carboxaldehyde	Heterocyclic compounds	Indole and Its derivatives	1074-86-8	2.14954e+06	1.99505e+06	2.05005e+06	1.98055e+06	2.08276e+06	1.92611e+06	1.9688e+06	1.96732e+06	1.88363e+06	1.84665e+06	1.77919e+06	1.78487e+06	1.74098e+06	1.61712e+06	1.74387e+06	1.69698e+06	1.63574e+06	1.66084e+06
C7H8N2O2	1,4-Dihydro-1-Methyl-4-Oxo-3-Pyridinecarboxamide	Heterocyclic compounds	Pteridines and derivatives	769-49-3	5.04699e+06	9.23378e+06	9.95541e+06	1.03848e+07	6.03547e+06	5.81713e+06	6.59199e+06	628201	6.09729e+06	1.13408e+06	3.70396e+06	5.60965e+06	9.69602e+06	8.34177e+06	6.54087e+06	1.03945e+07	9.72161e+06	7.7855e+06
C6H5NO3	3-Hydroxypicolinic acid	Heterocyclic compounds	Pteridines and derivatives	874-24-8	226818	237669	221041	159348	200427	372907	406410	491460	263412	360628	268599	351672	192164	123321	230772	136621	185001	188371
C7H8N2O2	N'-Methyl-2-pyridone-5-carboxamide	Heterocyclic compounds	Pteridines and derivatives	701-44-0	528610	929205	933844	1.05543e+06	876830	873585	660577	327586	669830	238686	570801	711293	1.27856e+06	908113	694601	1.09624e+06	951551	973040
C18H36O4	9,10-dihydroxystearic acid	FA	FFA	120-87-6	45817.7	33256.4	40461	55981.3	47899.2	69529.5	135727	74994	83131.7	116765	109089	183850	66957.1	67074.8	78366.8	45430.4	42035.3	53276.2
C15H30O2	FFA(15:0)	FA	FFA	1002-84-2	127819	124945	572877	5.42529e+06	4.82103e+06	183399	5.17175e+06	6.06179e+06	6.07317e+06	5.88185e+06	6.29084e+06	5.96147e+06	1.1836e+07	9.78963e+06	8.12509e+06	6.5348e+06	9.3412e+06	6.76481e+06
C16H32O2	FFA(16:0)	FA	FFA	57-10-3	2.01098e+06	2.23866e+06	1.01792e+07	5.00433e+06	4.56498e+06	4.99904e+06	1.69556e+08	1.81936e+08	1.30112e+08	2.32994e+08	2.43075e+08	2.05287e+08	2.61952e+08	226388689	2.79574e+08	217400420	2.27484e+08	2.34364e+08
C17H34O2	FFA(17:0)	FA	FFA	-	119502	101553	119117	800402	714423	928910	951536	803946	930307	927159	871103	790452	971762	1.21043e+06	1.22841e+06	987581	904596	943640
C18H34O4	12,13-DiHOME	FA	Oxidized lipids	263399-35-5	14984.5	14257.7	17210.8	22254.2	18003	36645.7	101285	50455.5	98218	95650.1	80436.7	133606	28451.5	46685.7	48075	23015.2	29033.8	35129
C18H34O5	9(S),12(S),13(S)-TriHOME	FA	Oxidized lipids	97134-11-7	142858	125400	109887	124905	123104	186383	1.06513e+06	422107	744988	929786	781483	1.3474e+06	210099	279279	164323	82378.9	158260	195071
C18H30O3	9(S)-HOTrE	FA	Oxidized lipids	89886-42-0	2746.8	6462.88	14075	12816.7	6177.32	6335.95	25667.4	10474.4	19938.4	23169.4	15915.3	31646.9	6523.25	5077.25	21692.5	7631.18	11796.2	14830.2
C18H34O4	9,10-DiHOME	FA	Oxidized lipids	-	155583	71058.5	202198	208244	211073	278411	1.68063e+06	686100	989865	1.38607e+06	1.03663e+06	2.24537e+06	226371	335684	805844	163630	151454	294439
C18H34O4	9,10-Epoxy-18-hydroxyoctadecanoic acid	FA	Oxidized lipids	3233-92-9	164598	75325.6	232527	206311	228615	327551	1.72975e+06	743838	942523	1.51378e+06	1.1752e+06	2.39858e+06	257012	340290	799653	193357	153918	313331
C20H32O5	LXB4	FA	Oxidized lipids	98049-69-5	17380.3	13406.6	6671.87	26618.3	19615.6	26652.7	89939.1	51013.5	83851.6	82667.6	64063.7	104294	28346.6	42199.4	26804.4	21372	15497.2	39558
C20H32O5	PGD2	FA	Oxidized lipids	41598-07-6	10847.1	3119.17	14869.9	22063.7	8692.64	28997.8	28885.1	18457.2	29111.9	25461.8	34688.1	41877.4	31895.9	16068.9	11520.5	6537.08	6907.23	13492.1
C20H32O5	PGF3α	FA	Oxidized lipids	745-64-2	68164.7	50555.3	64888.3	63167	60308.2	106561	220844	133160	175447	231102	165868	280244	102572	124656	90649	59733.1	76750.6	77901.8
C18H34O3	cis-EODA	FA	Oxidized lipids	2443-39-2	31196.8	67052	100408	118613	128369	183271	290319	138750	345245	324711	257521	533103	162689	101270	222547	88417.5	227083	145335
C17H33NO4	Carnitine C10:0	FA	CAR	1492-27-9	652262	445721	359475	442787	578933	397976	164814	258835	205212	251203	157432	285666	571006	587051	387392	423874	451809	553997
C17H31NO4	Carnitine C10:1	FA	CAR	98930-66-6	205020	107570	116251	171897	221775	161437	33559.4	90457.2	73875.7	67231.1	24378.7	73966.4	136097	185510	119587	140335	183661	174956
C18H33NO6	Carnitine C11:DC	FA	CAR	-	327321	343916	147789	243464	293315	249690	128278	145754	191972	127812	124970	123507	443848	480817	422559	337779	529529	412397
C19H37NO5	Carnitine C12-OH	FA	CAR	-	327321	343916	147789	243464	293315	249690	128278	145754	191972	127812	124970	123507	443848	480817	422559	337779	529529	412397
C19H35NO5	Carnitine C12:1-OH	FA	CAR	-	169545	153684	85180	134408	162874	189996	70208.4	50708.9	63414.2	61791.1	52326.4	57073.9	245018	221376	197455	190828	239685	133276
C21H39NO4	Carnitine C14:1	FA	CAR	-	817030	650607	444272	641264	746251	512458	225767	380463	226270	171160	152269	250988	770923	901979	532214	913686	680589	826858
C21H39NO5	Carnitine C14:1-OH	FA	CAR	-	66593.1	78494.7	20036.2	44963.2	51796.8	40198.8	11583.3	17627.7	26991.8	18708.5	18191.4	32070.1	86436.4	101966	62063.8	87128.5	62366.3	72171.5
C21H35NO6	Carnitine C14:2:DC	FA	CAR	-	2.73692e+06	2.3128e+06	1.57802e+06	2.15897e+06	2.42833e+06	2.18638e+06	815395	1.15917e+06	1.05042e+06	972113	741755	1.03187e+06	3.60355e+06	3.52483e+06	2.51196e+06	2.63893e+06	1.95925e+06	2.93629e+06
C27H47NO4	Carnitine C20:3	FA	CAR	-	84141	68448.7	51969.7	74675	84890.4	64363.2	58420	64206.4	67085.2	48027.1	36942.3	51706.2	98306.8	117925	78467.7	93919.3	76843.9	97057
C10H19NO4	Carnitine C3:0	FA	CAR	17298-37-2	7.60774e+07	7.38673e+07	5.18745e+07	5.8814e+07	7.14115e+07	6.19093e+07	4.91755e+07	5.90717e+07	4.40657e+07	5.03094e+07	3.2237e+07	5.33678e+07	8.2749e+07	6.2523e+07	6.54359e+07	7.78036e+07	8.89755e+07	4.85727e+07
C10H17NO6	Carnitine C3:1-2OH	FA	CAR	910825-21-7	12096605	11035280	11107235	14165180	9995820	14855615	5.32807e+06	5.99214e+06	10174515	9815560	8813005	9806645	25341780	22147600	24183235	21309300	17561350	11328725
C13H25NO5	Carnitine C6-OH	FA	CAR	-	1.23626e+06	1.23567e+06	910281	1.38236e+06	1.03942e+06	1.6785e+06	687868	652419	866573	674603	781164	891779	2.03321e+06	2.04696e+06	1575845	1.22472e+06	2.20995e+06	1.07327e+06
C15H29NO5	Carnitine C8-OH	FA	CAR	-	609213	615034	426680	673908	745332	796386	335629	313996	112448	340873	321782	551546	912422	960259	716864	592323	1.14767e+06	656027
C15H29NO4	Carnitine C8:0	FA	CAR	3671-77-0	714151	517227	491159	674128	610631	550072	266157	322225	348139	339963	260102	490597	749230	726024	537590	482502	722725	682241
C15H27NO4	Carnitine C8:1	FA	CAR	-	160018	162626	111585	154213	136657	138786	73157.1	95632.3	99180.3	57787.1	64760.6	75965.5	138031	145207	103671	106668	133254	128382
C14H19NO4	Carnitine ph-C1	FA	CAR	105450-08-6	30876.1	55397.7	22796.8	36962.7	66793.3	20953.3	100612	201294	116149	167319	127477	207579	92634.7	38278	44783	71305.6	65910.6	55783.3
